# Supplementary material
Source: PubMed Central journal article supplement (PMC3135383)
Supplement: NIHMS301628-supplement-1.pdf [file NIHMS301628-supplement-1.pdf]

## 1 Supplement Material

### 2 Expanded Methods

#### 3 Identification of potential regulatory regions

4 To identify CNS elements, we compared the human *SCN5A* locus with its mouse  
5 ortholog using the VISTA Genome Browser (<http://pipeline.lbl.gov/cgi-bin/gateway2>).<sup>1,2</sup>  
6 Each of 92 CNS elements identified was then PCR amplified and assayed for activity as  
7 described below. Those showing >5-fold increase in reporter activity in luciferase assays  
8 were then analyzed for potential muscle-specific transcriptional regulatory modules using  
9 the M-SCAN algorithm (<http://www.cisreg.ca/cgi-bin/mscan/MSCAN>).<sup>3,4</sup> For identification  
10 of potential repressive transcription factors in CNS28 we used rVista  
11 (<http://rvista.dcode.org/>) to compare human and mouse sequences for conserved  
12 transcription factor binding sites.<sup>5,6</sup>

#### 13 Generation of reporter constructs

14 Three sets of reporter constructs were made. Initial screening experiments  
15 examined luciferase reporter activity of CNS constructs in the pGL3-Promoter vector  
16 (Promega). Subsequently, we conducted a series of experiments examining the effect  
17 of CNS28 on the activity of the *SCN5A* core promoter and CNS28 truncation constructs  
18 with the previously identified alternate promoter.<sup>7</sup> Each of the 92 CNS identified in the  
19 initial VISTA scan was PCR-amplified thus generating a series of luciferase fusion  
20 constructs (pGL3-CNS1 through pGL3-CNS92). The PCR reactions used forward  
21 primers containing an *NheI* recognition sequence at the 5' end and reverse primers  
22 containing an *XhoI* recognition sequence (See Supplemental Table 1). PCR products  
23 were digested with *NheI* and *XhoI*, and the fragments were subcloned into the pGL3-  
24 Promoter vector.

25 The starting point for generating CNS28/*SCN5A* promoter constructs, was the  
26 pGL3-Basic vector containing the full length *SCN5A* promoter we previously generated.<sup>8</sup>  
27 CNS28 was amplified from human genomic DNA obtained from Vanderbilt University's  
28 Polymorphism Discovery Core, using modified versions of the CNS28 primers, F\_ *Sall*  
29 and R\_ *BamHI* (Table 1), and the Expand High Fidelity Kit (Roche) following the protocol  
30 provided. CNS28 was inserted into the vector using the *Sall/BamHI* sites downstream of  
31 the luciferase cDNA. All constructs were verified by direct sequencing.

32 Experiments were also conducted to analyze CNS28 truncation constructs.  
33 Human and mouse CNS28 sequences were compared and scanned for conserved  
34 transcription factors using rVista 2.0.<sup>5,6</sup> Five fragments were amplified based on the  
35 location of regulatory elements from the rVista analysis. DC1-F, DC2-F, and DC3-F  
36 (Table 1) remove the first 50, 150, and 280 base pairs from CNS28 respectively. The  
37 universal reverse primer, DC-R, as well as DC0-F and DC4-F (Table 1) amplify the  
38 alternate promoter previously identified,<sup>7</sup> with and without the whole CNS28 fragment  
39 respectively. PCR fragments were amplified using the Expand Long kit (Roche) with  
40 CNS28<sup>-/-</sup> mouse genomic DNA as the template. The cycling conditions used were an  
41 initial denaturing step of 94°C for 2' followed by 35 cycles of 94°C for 20", 65°C for 30",  
42 and 72°C for 2' and a final 7' extension at 72°C. PCR fragments were digested with  
43 *KpnI/BglII* and inserted into the pGL3-Basic vector (Promega). All constructs were  
44 verified by direct sequencing.

#### 45 Mutagenesis

46 Mutagenesis on DC3 was performed using the QuickChange II XL kit  
47 (Stratagene) using the primers listed in Table 1. The standard protocol provided with the  
48 kit was followed and the construct was verified by direct sequencing.

#### 49 Reporter assays

50

1 Experiments were conducted as previously described in CHO cells<sup>8,9</sup> and in  
2 cardiomyocytes<sup>8-10</sup> isolated from 1-2 day old mice. The pGL3-CNS/luciferase fusion  
3 genes (125 ng DNA) were transfected into the neonatal mouse cardiac cells using  
4 FuGENE 6 (Roche), and into CHO cells using lipofectamine reagent (Invitrogen). The  
5 pGL3-Promoter plasmid was tested in each experiment and its activity level served as  
6 the no insertion control and its activity was designated as 100%. The SCN5A Promoter  
7 and SCN5A Promoter-CNS28/luciferase genes (500 ng DNA) were transfected into both  
8 cell lines using FuGENE 6 (Roche) with the construct containing CNS28 designated as  
9 100% activity. The CNS28 truncation constructs containing the alternate mouse  
10 promoter (250 ng DNA) were transfected into both cell lines using FuGENE 6 (Roche).  
11 The construct containing the full CNS28 sequence was designated 100% activity. In  
12 each experiment, the pRL-TK plasmid (5-10 ng), encoding Renilla luciferase, was co-  
13 transfected to normalize for experimental variability caused by differences in cell viability  
14 or transfection efficiency. Luminescence was measured after 48 hr transfection by using  
15 Dual-Luciferase Reporter Assay System (Promega). The DC3 mutant transfection and  
16 luciferase assay were performed in an identical manner to the truncation constructs.

### 17 **Generation of CNS28-KO mice**

18 Mouse embryonic stem (ES) cells in which a region of the *Scn5a* gene was  
19 modified to allow RMCE to be used to easily generate mice containing allelic variant of  
20 human sodium channels under control of the *Scn5a* regulatory sequences.<sup>11</sup> Using this  
21 approach, we generated H/H mice in which the targeted region was replaced by the  
22 human SCN5A full-length cDNA. For the present experiments, we modified the original  
23 H exchange construct to delete bases 1720 to 2154 (that encompass the CNS28  
24 region), and then performed RMCE as previously described to generate CNS28<sup>+/-</sup>  
25 animals. After removal of a hygromycin resistance cassette by breeding to a FlpE-  
26 expressing line, mice were then interbred to generate CNS28<sup>-/-</sup> animals.<sup>11</sup> Experiments  
27 began after three backcrosses using littermate H/H mice as controls. All experiments  
28 performed on mice were approved by the institutional animal care and use committee.

### 29 **Quantitative Real Time RT-PCR**

30 Total mRNA from adult mice atria or ventricles was isolated using the TRIzol  
31 method (Invitrogen) and cDNA was prepared using the Transcriptor First Strand cDNA  
32 Synthesis kit (Roche). Quantitative Real Time RT-PCR (qPCR) on *SCN5A* was  
33 performed with TaqMan probes targeting human *SCN5A* (Hs00165693\_m1) using beta  
34 actin (Mm00607939\_s1) as a reference gene. qPCR targeting mouse *Scn1b* was  
35 performed using TaqMan probe (Mm00441210\_m1) with *Hprt1* (Mm00446968\_m1) as  
36 the reference gene. The reactions were performed using the TaqMan Fast Universal  
37 PCR Master Mix in a 7900HT thermocycler (Applied Biosystems). Cycling conditions  
38 were an initial step of 15" at 95° C, followed by 40 cycles of 1" at 95° C and 10" at 60° C.  
39 Standard dilutions of plasmids containing the target genes were used to quantitate the  
40 amounts of mRNA present in our samples. Relative mRNA amounts were calculated  
41 comparing human *SCN5A* to mouse beta actin levels and were normalized to the levels  
42 in H/H mice. Analysis was performed using SDS 2.2.2 software (Applied Biosystems)

### 43 **Western blotting**

44 Western blot analysis of Na<sub>v</sub>1.5 (SCN5A protein) and calnexin was performed  
45 using 100ug of whole heart protein extract. Blots were cut to separate the SCN5A and  
46 calnexin bands and were stained with anti-SCN5A antibody (Alomone ASC-005 1:250  
47 dilution) or anti-calnexin antibody (Stressgen SPA860 1:2000 dilution) respectively. The  
48 secondary antibody was anti-rabbit IgG HRP-conjugate (Promega W401B 1:10,000  
49 dilution). Films were scanned on a standard desktop scanner and band density was  
50 measured using ImageJ, freely available from the NIH. Relative protein levels were

1 calculated for each sample by comparing band densities for SCN5A and calnexin  
2 signals.

### 3 **Electrocardiogram (ECG) recordings and lidocaine challenge**

4 ECGs and drug challenges were recorded as previously described.<sup>12</sup> In brief,  
5 adult mice were anesthetized with isoflurane vapor adjusted to maintain the light  
6 anesthesia and a constant heart rate throughout the recording procedure. Electrodes  
7 were inserted subcutaneously in each limb and baseline recordings were obtained over  
8 5 minutes. For lidocaine challenge, ECGs were recorded at baseline as described above  
9 and for an additional 20 minutes after intraperitoneal injection of lidocaine 40 mg/kg  
10 (Sigma). ECG signals were averaged over 10 second epochs and intervals were  
11 obtained from the signal averaged tracings using a custom signal averaging program  
12 using National Instruments LabView.

### 13 **Isolation of mouse ventricular cardiomyocytes and sodium current recordings**

14 Adult H/H and CNS28<sup>-/-</sup> mouse cardiac ventricular myocytes were isolated by a  
15 modified collagenase/protease method.<sup>13</sup> After intraperitoneal injection of 500 IU of  
16 heparin, adult mice were anesthetized using inhaled isoflurane/oxygen mixture, hearts  
17 excised, and their aortae rapidly cannulated and perfused with modified Tyrode's  
18 solution (MTS) for 3 min followed by MTS containing collagenase (Liberase Blendzyme-  
19 4, Roche, 0.04 mg/ml) for 5–7 min at a constant pressure of 80 mmHg and temperature  
20 of 34 °C. The MTS contained (in mmol/l) NaCl 130, HEPES 10, glucose 10, KCl 5.4,  
21 MgCl<sub>2</sub> 1.2, NaH<sub>2</sub>PO<sub>4</sub>, 2,3-butanedione monoxime 10, pH of 7.2. The digested ventricles  
22 were minced in MTS containing 1 mg/ml bovine serum albumin and 0.2 mmol/l CaCl<sub>2</sub>  
23 and triturated by gently pipetting. The resulting solution was strained and the myocytes  
24 allowed to sediment in MTS of increasingly higher Ca<sup>2+</sup> concentrations (0.2, 0.5, and 1  
25 mmol/l). This procedure routinely yielded 60–80% rod-shaped, Ca<sup>2+</sup>-tolerant myocytes  
26 that were used for the electrophysiology studies.

27 To control I<sub>Na</sub>, external sodium concentration was lowered to 5 mM, wide-tip  
28 electrodes with tip resistance <1 MΩ were used, and experiments were conducted at  
29 18°C. I<sub>Na</sub> was recorded using whole-cell voltage clamp. The pipette-filling (intracellular)  
30 solution contained (in mmol/L): NaF 10, CsF 110, CsCl 20, EGTA 10, HEPES 10, with a  
31 pH of 7.4 adjusted with CsOH. The bath (extracellular) solution had (in mmol/L): NaCl 5,  
32 CsCl 5, TEA-Cl 135, CaCl<sub>2</sub> 0.1, MgCl<sub>2</sub> 1, HEPES 10, and glucose 10, with a pH of 7.4  
33 adjusted by CsOH. To eliminate L- and T-type inward calcium currents, 0.5 μM  
34 nisoldipine and 200 μM NiCl were added to the bath solution. Data acquisition was  
35 carried out using an Axopatch 200B patch-clamp amplifier and pCLAMP version 9.2  
36 software (MDS Inc., Mississauga, Ontario, Canada). Currents were filtered at 5 kHz (-3  
37 dB, four-pole Bessel filter) and digitized using an analog-to-digital interface (Digidata  
38 1322A, MDS Inc.). To minimize capacitive transients, capacitance, and series resistance  
39 were adjusted to 70–85%. The holding potential was -120 mV for all experiments, and  
40 details of the pulse protocols are presented schematically in the figures. I<sub>Na</sub> densities in  
41 H/H and CNS28<sup>-/-</sup> mice were compared as pA/pF after normalization to cell sizes which  
42 were generated from the cell capacitance calculated by Membrane Test (OUT 0) in  
43 pClamp 9.2. Electrophysiologic data were analyzed using Clampfit version 9.2 (Axon  
44 Instruments), and figures were prepared by using Origin 7.0 (OriginLab Corp.,  
45 Northampton, MA, USA). Current-voltage relations for steady-state activation and  
46 inactivation were fit with the Boltzmann equation  $I/I_{max} = (1 + \exp[(V - V_{1/2})/k])^{-1}$   
47 to determine the membrane potential for half-maximal activation (V<sub>1/2</sub>-activation) and  
48 inactivation (V<sub>1/2</sub>-inactivation).<sup>11</sup>

### 49 **Echocardiogram**

50 Transthoracic echocardiograms were performed on resting conscious mice at the  
51 Murine Cardiovascular Core, Vanderbilt University as previously described.<sup>14</sup> Signals

1 were acquired using a 15-MHz transducer (Sonos 5500 system, Agilent) and analyzed  
2 by a sonographer who was blind to the genotype.

3 **Data analysis**

4 Results are presented as mean $\pm$ SE, and statistical comparisons were  
5 made using the unpaired Student's t test. A value of  $P < 0.05$  was considered  
6 statistically significant.

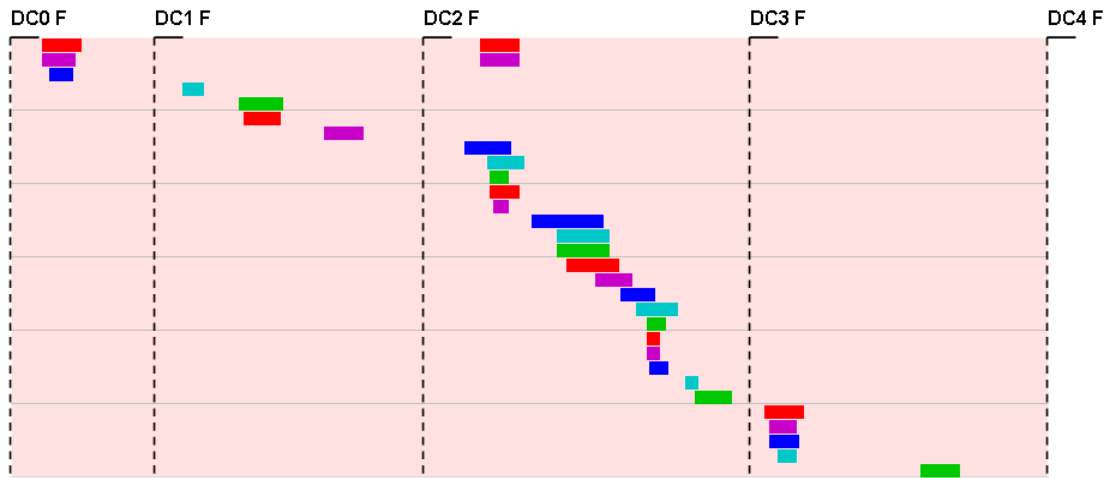

1  
2  
3  
4  
5  
6  
7

Online Figure I

Selection of deletion construct primer locations. Using the rVista output of the human and mouse CNS28 alignments as a guide, locations for the forward primer of the deletion constructs were chosen within the gaps between clusters of predicted transcription factor binding sites.

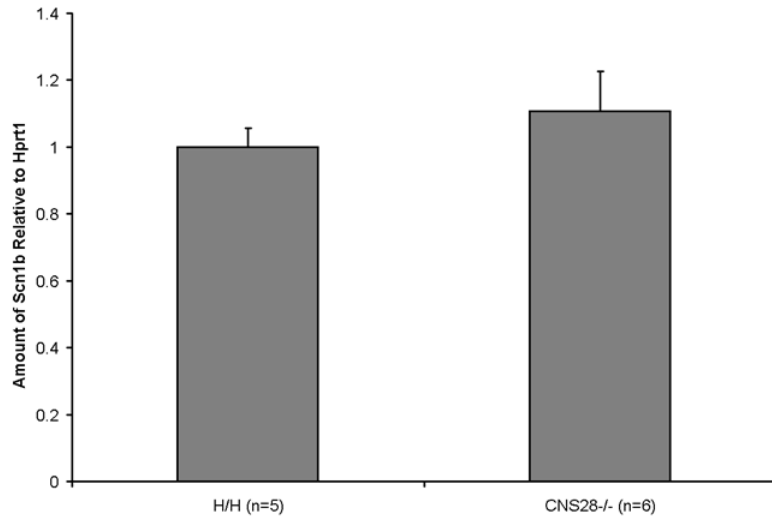

1  
2  
3  
4  
5

Online Figure II  
Relative amount of *Scn1b*. Using Real-Time PCR we analyzed amounts of *Scn1b* transcript relative to *Hprt1* levels. There was no significant difference between H/H mice and CNS28<sup>-/-</sup> mice.

1

2 **Online Table I. Primer pairs used to amplify CNS (In Order of Position)**

| Forward Primer                                   | Reverse Primer                               | Position |
|--------------------------------------------------|----------------------------------------------|----------|
| CNS-2F: GCGTGCTAGCCGAGTGGTTGATGTCTCCGCCCT        | CNS-2R: AGATCTCGAGTACTGGAAGTCAATGCTTCGGG     | 5'-end   |
| CNS-3F: GCGTGCTAGCCTACCTGGCAGAAATGGGTACAT        | CNS-3R: AGATCTCGAGCAGACTTTACCCAT TCTACTGC    | 5'-end   |
| CNS-6F: GCGTGCTAGCCTTCCAGGAGACATTTACAAGAC        | CNS-6R: AGATCTCGAGCCTGGCTTCTTTCATTTAATAAGG   | 5'-end   |
| CNS-7F: GCGTGCTAGCCTAACTTCTACAAATCAATGCAA        | CNS-7R: AGATCTCGAGATAGATGTGTGGTGGTATTTCA     | 5'-end   |
| CNS-8F: GCGTGCTAGCCCCGTCATCTACATTAGGTAAT         | CNS-8R: AGATCTCGAGCAAGTCAATCCTAATCCTGTTT     | 5'-end   |
| CNS-9F: GCGTGCTAGCCCAGTGA ACTCTGGCTCCAGAAA       | CNS-9R: AGATCTCGAGAACTGGTATTTAAAGGGTCAGC     | 5'-end   |
| CNS-10F: GCGTGCTAGCCACATAACAGCAA ACTGATTCACATC   | CNS-10R: AGATCTCGAGGTGTGCTTGCATTTTAAAGGAA    | 5'-end   |
| CNS-78F GCGTGCTAGCCGTGGGTTGAAACGTTGACACT         | CNS-78R AGATCTCGAGTGAGTGGGGTGTCTGGGGTACA     | 5'-end   |
| CNS-79F GCGTGCTAGCCGGTATTTCTCCTAATGCTAAAA        | CNS-79R AGATCTCGAGGATTGGCTAATTGTTTCTTAGC     | 5'-end   |
| CNS-88F GCGTGCTAGCCGGGTGTCTGGTAGCCTTCCCAA        | CNS-88R AGATCTCGAGAGCGATCCCTGCATCCTACGGG     | 5'-end   |
| CNS-89F GCGTGCTAGCCGTGTACCATTGTGCAGATTTCT        | CNS-89R AGATCTCGAGACACACTGACACTGAGGAAG       | 5'-end   |
| CNS-90F GCGTGCTAGCCCTGGGCCCTAGTGAGA AACT         | CNS-90R AGATCTCGAGGTTCTGACATTGTGACCAGTGG     | 5'-end   |
| CNS-1F: GCGTGCTAGCCGCTGGAGGCGGAGATTAAGAGT        | CNS-1R: AGATCTCGAGAAGACTTCTACCTGCTTTGGGG     | intron1  |
| CNS-4F: GCGTGCTAGCCTCTGTGCTGAAAAGAGCCTCAT        | CNS-4R: AGATCTCGAGGCTCAGTTCTAGGCTTATTTGC     | intron1  |
| CNS-5F: GCGTGCTAGCCTTTGCAGCGACAGCCTCACCCAC       | CNS-5R: AGATCTCGAGCCATAGACCCCAAGGGATCCTT     | intron1  |
| CNS-11F: GCGTGCTAGCCTTCTCGAAGGGGTGGAGATCTC       | CNS-11R: AGATCTCGAGGAGCACAAGAGTGAGTCCTGCA    | intron1  |
| CNS-12F: GCGTGCTAGCCCTCGGCTCCCTCTCTGTGTGTT       | CNS-12R: AGATCTCGAGGCCTCCTCTGAACAGAACACAA    | intron1  |
| CNS-13F: GCGTGCTAGCCGGGTGTGCAGTGGTAGAAGTGT       | CNS-13R: AGATCTCGAGGGCCCAACGAATCACTCAACTA    | intron1  |
| CNS-14F: GCGTGCTAGCCGAGCGGAGTTAAAGCCAAGGTC       | CNS-14R: AGATCTCGAGCCATTATGATGGTCCCTACCTC    | intron1  |
| CNS-15F: GCGTGCTAGCCAGTAGGAGGCGCTGCAGAAGGCAA     | CNS-15R: AGATCTCGAGGGCTTCCATTCCCACCAAGTCA    | intron1  |
| CNS-16F: GCGTGCTAGCCGAGAGGTTCTGTGCCTCTGTTTCTGACC | CNS-16R: AGATCTCGAGACAAAGCCTGGTCCTGGGACTGTCC | intron1  |
| CNS-17F: GCGTGCTAGCCCTTCTTCTGTTTAAATCTCCTAGG     | CNS-17R: AGATCTCGAGATGATGACAGGGGTTTCTGAGT    | intron1  |
| CNS-18F: GCGTGCTAGCCCTCTCTTGGTGCACACAGTAGGT      | CNS-18R: AGATCTCGAGGAAACACCGTCATGGCACACAG    | intron1  |
| CNS-19F: GCGTGCTAGCCTGTGTGTTTACACAGAGATGGTCT     | CNS-19R: AGATCTCGAGATATGCTGAGTGGCACTTCGCT    | intron1  |
| CNS-20F: GCGTGCTAGCCCTTCAGCAGAGCAGCAGAGCTAA      | CNS-20R: AGATCTCGAGGCGATCTTGCTAAGTCCTGAAG    | intron1  |

|                                                  |                                             |         |
|--------------------------------------------------|---------------------------------------------|---------|
| CNS-21F: GCGTGCTAGCCGTGAAATTAACCTGAACACATT       | CNS-21R: AGATCTCGAGGCTATTGTAAAGTCACATCCAT   | intron1 |
| CNS-22F: GCGTGCTAGCCCAGTGAATGAGTGGCCACCCTG       | CNS-22R: AGATCTCGAGTATGCAGCCCAGATGCTCCCAG   | intron1 |
| CNS-23F: GCGTGCTAGCCTTTACGAATGGGAAAACCTGAGGTAG   | CNS-23R: AGATCTCGAGAGAAATGCCCTGAGCCAGAGAA   | intron1 |
| CNS-24F: GCGTGCTAGCCGACTGCAAACCCTAGGTGCTGG       | CNS-24R: AGATCTCGAGAATCAGGTTACCCTGGGGAGCCTC | intron1 |
| CNS-25F: GCGTGCTAGCCTGAACCTGAGCCCAGAGCATCCTC     | CNS-25R: AGATCTCGAGCAAGGGAGCTGCTGAAACCAGA   | intron1 |
| CNS-26F: GCGTGCTAGCCTGTACCAGTGAGCCTCTGCAGAT      | CNS-26R: AGATCTCGAGTACAGGGCAACCCTCTCCACTG   | intron1 |
| CNS-27F: GCGTGCTAGCCATGCATTGATGAGTGTTACAGA       | CNS-27R: AGATCTCGAGTAAGAGGCACTCTGTGTCTTTT   | intron1 |
| CNS-28F: GCGTGCTAGCCAGCTCGTTGGGGTCATCGGTGA       | CNS-28R: AGATCTCGAGCCAAGTGACAGCAGAACC GGAA  | intron1 |
| CNS-86F GCGTGCTAGCCAGGGGGAGAAGGGGCGCAGATC        | CNS-86R AGATCTCGAGCATATCCAGCCCTGCTCGGTCA    | intron1 |
| CNS-76F GCGTGCTAGCCAGGCTGGAAGGTGGGCTTAGTC        | CNS-76R AGATCTCGAGATCCTCTCCCCATAAGCTTGAC    | intron2 |
| CNS-77F GCGTGCTAGCCTCCCTTGCAATGGAGCAGAGG         | CNS-77R AGATCTCGAGGCATCTCAGGCTGCATAATTCC    | intron2 |
| CNS-87F GCGTGCTAGCCGGGGACCAGCAGGTGAGCGAGT        | CNS-87R AGATCTCGAGCACGCAGGGACTGGAGGCTTCG    | intron2 |
| CNS-29F GCGTGCTAGCCAACCATTTCCCAATAAAGAGGC        | CNS-29R AGATCTCGAGTTACGCTGCATCACTCCAATGG    | intron3 |
| CNS-71F GCGTGCTAGCCTCCACACGAGACCCTACCAGCA        | CNS-71R AGATCTCGAGACCCAGGCTGGTCTTTTCCCT     | intron3 |
| CNS-72F GCGTGCTAGCCACTCAGGCACTCCTTGCTGGCA        | CNS-72R AGATCTCGAGGCCTAAAGCATAACCAGGTCCC    | intron3 |
| CNS-73F GCGTGCTAGCCAGTGATTCCGCTTGGCCTTGTTCTT     | CNS-73R AGATCTCGAGGTGCTATTAATCAACAGGCAC     | intron3 |
| CNS-74F GCGTGCTAGCCGTCCATTGAGCAATGGCTCTGAGGCT    | CNS-74R AGATCTCGAGAATGTGCTCCCATCCCAGGCA     | intron3 |
| CNS-75F GCGTGCTAGCCGGCCCTTGGGAATTTTATAGT         | CNS-75R AGATCTCGAGTCAGAGCAAGAAAAGCTGGCCT    | intron3 |
| CNS-85F GCGTGCTAGCCAGCAGGAGGAGGAAAGGCCAGCTT      | CNS-85R AGATCTCGAGATTTGCCCCACGACCCAGCTCA    | intron3 |
| CNS-70F GCGTGCTAGCCACCAAGTATGTCGAGTGAGTATCTTCAGG | CNS-70R AGATCTCGAGAAGTTCCTGGGCCTGGACACAA    | intron4 |
| CNS-30F GCGTGCTAGAGGGCAGGCGGTGGTTCTGCTTTGTA      | CNS-30R AGATCTCGAGCCCAGGTCCACAAATTCAGTTG    | intron5 |
| CNS-66F GCGTGCTAGCCGCAGAGTGTTGCCTTCTAGCA         | CNS-66R AGATCTCGAGCATAGGACTTCGGCTTGAGTGC    | intron5 |
| CNS-67F GCGTGCTAGCCTTGCACTCACCCAGAGCCACA         | CNS-67R AGATCTCGAGAGGACATGCAGTATATGGGCCA    | intron5 |
| CNS-68F GCGTGCTAGCCAGGCTCAGCCAGAGCTTTCCTGTG      | CNS-68R AGATCTCGAGCCCCTGCAGGGAAAGCCTTCTT    | intron5 |
| CNS-69F GCGTGCTAGCCATCGACCTGAAGAGTGGGGAA         | CNS-69R AGATCTCGAGACCTCCTCGGCTCTGACATGAA    | intron5 |
| CNS-31F GCGTGCTAGCCTGGTGATAGAAGTAGGGCCAGA        | CNS-31R AGATCTCGAGTTGCCAACATCTGTCAAGGAGA    | intron6 |
| CNS-32F GCGTGCTAGCCAGACCTGTGAGGTCCACCCACT        | CNS-32R AGATCTCGAGAGAGGATGACCTCCCATGGTG     | intron6 |
| CNS-64F GCGTGCTAGCCACAGAAGCCACAGGCGCTCCTA        | CNS-64R AGATCTCGAGTTGCCCTGTCCCTCTAGAACCT    | intron6 |



|                                                 |                                          |          |
|-------------------------------------------------|------------------------------------------|----------|
| CNS-65F GCGTGCTAGCCTTCAGGTGAAAATCAGGTAAACAC     | CNS-65R AGATCTCGAGGAAAAGCAGTCCACTATCTTGG | intron6  |
| CNS-63F GCGTGCTAGCCCTGAGTGGTTTCGGGTAGGGT        | CNS-63R AGATCTCGAGATCCTGCTGCCAGTGCCCCAT  | intron7  |
| CNS-62F GCGTGCTAGCCTCCCTAGGCTATGGCTATTTG        | CNS-62R AGATCTCGAGAGATCTTCCCTGCGGACCTGAG | intron9  |
| CNS-84F GCGTGCTAGCCGGAGCGCCTCTATCAGCAGGTGTGT    | CNS-84R AGATCTCGAGTTGTCCCCTGTCCCCTCCAAAG | intron9  |
| CNS-61F GCGTGCTAGCCTGCCACTTTAGCCACTCCTAT        | CNS-61R AGATCTCGAGCACACCTACCCCAAATGAGGA  | intron12 |
| CNS-33F GCGTGCTAGCCGGTCAGCAGCTGGGAGCGCTAATA     | CNS-33R AGATCTCGAGGCCCAACCCTGTGCTTTGTTTT | intron14 |
| CNS-58F GCGTGCTAGCCTCACAGGGAAATGGCTAAACCA       | CNS-58R AGATCTCGAGCTTCCATGCCAATTAACACAA  | intron14 |
| CNS-59F GCGTGCTAGCCAGTTGTGTTATAGCTATATTTTGTCTG  | CNS-59R AGATCTCGAGGCTTTTCCCATGCTGATTATTT | intron14 |
| CNS-60F GCGTGCTAGCCAGCTGGGTGTAGTAAGTAAATC       | CNS-60R AGATCTCGAGCAGCTATCATTTGTTTTGAGTG | intron14 |
| CNS-83F GCGTGCTAGCCAAAAGGTCATGGGAATGGAATA       | CNS-83R AGATCTCGAGTGGAGATGAAATTGTGTAGTCA | intron14 |
| CNS-91F GCGTGCTAGCCGCACTAGTTTCCTCTCCTCATT       | CNS-91R AGATCTCGAGTGGTCACAACACTTTGCACATG | intron14 |
| CNS-82F GCGTGCTAGCCAGACTGTCTATTCTGGGGAGAATGAG   | CNS-82R AGATCTCGAGATGCCACCCACAGAGTCTAGG  | intron16 |
| CNS-57F GCGTGCTAGCCCTCCAGGACTGGCAAGGTAGA        | CNS-57R AGATCTCGAGAGAAGAAGCCATCTGAGCCTGG | intron17 |
| CNS-34F GCGTGCTAGCCCAAATGTGTGGGTGGGGTTGC        | CNS-34R AGATCTCGAGCAGGCATGTCACATCCAGAACA | intron18 |
| CNS-56F GCGTGCTAGCCTGGAAATTCTGGTCCCAAATCT       | CNS-56R AGATCTCGAGAAGTCTTCTTTGGATGGGGAGA | intron18 |
| CNS-35F GCGTGCTAGCCTGCCTCGCTCTGTTCCAGAAT        | CNS-35R AGATCTCGAGCCTTTTGCTGTGAGATCTCTGT | intron20 |
| CNS-36F GCGTGCTAGCCTTGGGTCAGTGTGCTCACAGAG       | CNS-36R AGATCTCGAGCCAGACTGTGCTATGAGGCTCC | intron20 |
| CNS-51F GCGTGCTAGCCAGAACTACATAAACAGATCTGA       | CNS-51R AGATCTCGAGGGTTTCATTGTTTTACATTACA | intron20 |
| CNS-52F GCGTGCTAGCCAACTGACTCTCAAATTAACTTA       | CNS-52R AGATCTCGAGTTAATTAATTACACTGGCTAGT | intron20 |
| CNS-53F GCGTGCTAGCCCATATGATCTGCAGTAATAA         | CNS-53R AGATCTCGAGTTGGGGATGTGAGAAATTAGAT | intron20 |
| CNS-54F GCGTGCTAGCCTCACAGCAAAGGTAGAAGGA         | CNS-54R AGATCTCGAGATTTGAAAGCACATGGCTGAAG | intron20 |
| CNS-55F GCGTGCTAGCCACGTATGGAGGCCAGAGCAGGA       | CNS-55R AGATCTCGAGTGTAGGAGGCTGGTGATCTGGG | intron20 |
| CNS-37F GCGTGCTAGCCGAGACACACATAGCTTATTCCTGGTGGG | CNS-37R AGATCTCGAGAGTTTGCCCTTGGCTGGCTCTG | intron22 |
| CNS-50F GCGTGCTAGCCATCTGGGCTGATTTACAATTAAGACAC  | CNS-50R AGATCTCGAGTGCTTCCCTTTTAGTTCCCACA | intron26 |
| CNS-38F GCGTGCTAGCCGTTAAAACCACTCAACAGCCCC       | CNS-38R AGATCTCGAGCCTGGTTGAACTTGGGATATAT | 3'-end   |
| CNS-39F GCGTGCTAGCCCTGGTTGCTAGGGCCTGTCTA        | CNS-39R AGATCTCGAGTGTCCAGCATCCCTCCTCTTTG | 3'-end   |
| CNS-40F GCGTGCTAGCCGATAGAGGAGATGGGGTGAGGA       | CNS40R AGATCTCGAGACAGACCTCCCTCAGTCCTTTC  | 3'-end   |
| CNS-41F GCGTGCTAGCCAGCAACATCATTCTCAAATAACTGGC   | CNS-41R AGATCTCGAGTTCCAGGGCCACTCATTGTATT | 3'-end   |

|                                              |                                           |        |
|----------------------------------------------|-------------------------------------------|--------|
| CNS-42F GCGTGCTAGCCCCTCACCATTGTATCCAAATG     | CNS-42R AGATCTCGAGAACTTACTAGTTGGCCCATTCA  | 3'-end |
| CNS-43F GCGTGCTAGCCTTATCTGGAGAACAGACCTCC     | CNS-43R AGATCTCGAGTGACCTCATTTCCCTTTTCTTG  | 3'-end |
| CNS-44F GCGTGCTAGCCAGCCTCCCAGGCCTTCACTTCCACT | CNS-44R AGATCTCGAGAGGTGGTGGCTGGCCTGGAAGG  | 3'-end |
| CNS-45F GCGTGCTAGCCTGCCTTCATCCCTCCCTGACTCT   | CNS-45R AGATCTCGAGTGTCCACTCCCCGAGTCACATC  | 3'-end |
| CNS-46F GCGTGCTAGCCCTCCCTGTTTAAGAGAAGCCGG    | CNS-46R AGATCTCGAGTGAGACAGAGACCGAAGGGAGG  | 3'-end |
| CNS-47F GCGTGCTAGCCGGAAGCGCCATCCTCATGTGGGTA  | CNS-47R AGATCTCGAGTGCACACTCCCTGATGCTCTGC  | 3'-end |
| CNS-48F GCGTGCTAGCCAGCAAGGCTGCAGCTGTCACTG    | CNS-48R AGATCTCGAGCACCACACCCTTGCCCTCACTCT | 3'-end |
| CNS-49F GCGTGCTAGCCCTTGGGTGAGGCCAGCATATC     | CNS-49R AGATCTCGAGAGTGTCTGGCAAGGCTGGGAG   | 3'-end |
| CNS-80F GCGTGCTAGCCTACCTAGGACTTATCCCACAGA    | CNS-80R AGATCTCGAGTACCATTCTGTTTTGTCACACT  | 3'-end |
| CNS-81F GCGTGCTAGCCTGACCCCTCAACTTTTCTTTT     | CNS-81R AGATCTCGAGCCTGTCTTTTCCGAGTGGTATTA | 3'-end |
| CNS-92F GCGTGCTAGCCACAGGGAGATGCCTCAAATCC     | CNS-92R AGATCTCGAGGGCAACTGCCAGCCTTTAAGTA  | 3'-end |

---

1

2 **Online Table II. Echocardiogram Measurements of Adult Mice**

|                              | H/H (n=9)   | CNS28 <sup>-/-</sup> (n=5) |
|------------------------------|-------------|----------------------------|
| Septal Wall (mm)             | 0.72 ± 0.02 | 0.74 ± 0.05                |
| Posterior Wall (mm)          | 2.98 ± 0.11 | 3.06 ± 0.19                |
| Left Ventricle Systole (mm)  | 0.58 ± 0.02 | 0.52 ± 0.03                |
| Left Ventricle Diastole (mm) | 1.50 ± 0.06 | 1.65 ± 0.11                |
| Fractional Shortening %      | 49.7 ± 0.9  | 46.0 ± 1.9                 |

3

## References

- 1  
2  
3  
4  
5 1. Dubchak I, Brudno M, Loots GG, Pachter L, Mayor C, Rubin EM, and Frazer KA.  
6 Active Conservation of Noncoding Sequences Revealed by Three-Way Species  
7 Comparisons. *Genome Research* 2000. 10:1304-1306.
- 8 2. Mayor C, Brudno M, Schwartz JR, Poliakov A, Rubin EM, Frazer KA, Pachter LS,  
9 and Dubchak I. VISTA : visualizing global DNA sequence alignments of arbitrary  
10 length. *Bioinformatics* 2000. 16:1046-1047.
- 11 3. Alkema WBL, Johansson O, Lagergren J, and Wasserman WW. MSCAN:  
12 identification of functional clusters of transcription factor binding sites. *Nucl. Acids*  
13 *Res.* 2004. 32:W195-W198.
- 14 4. Johansson O, Alkema W, Wasserman WW, and Lagergren J. Identification of  
15 functional clusters of transcription factor binding motifs in genome sequences: the  
16 MSCAN algorithm. *Bioinformatics* 2003. 19:i169-i176.
- 17 5. Loots GG and Ovcharenko I. rVISTA 2.0: evolutionary analysis of transcription  
18 factor binding sites. *Nucl. Acids Res.* 2004. 32:W217-W221.
- 19 6. Ovcharenko I, Loots GG, Hardison RC, Miller W, and Stubbs L. zPicture: Dynamic  
20 Alignment and Visualization Tool for Analyzing Conservation Profiles. *Genome*  
21 *Research* 2004. 14:472-477.
- 22 7. Shang LL and Dudley SC. Tandem Promoters and Developmentally Regulated 5'  
23 and 3' mRNA Untranslated Regions of the Mouse Scn5a Cardiac Sodium Channel.  
24 *Journal of Biological Chemistry* 2005. 280:933-940.
- 25 8. Yang P, Kupersmidt S, and Roden DM. Cloning and initial characterization of the  
26 human cardiac sodium channel (SCN5A) promoter. *Cardiovascular Research*  
27 2004. 61:56-65.
- 28 9. Yang P, Koopmann TT, Pfeufer A, Jalilzadeh S, Schulze-Bahr E, Kaab S, Wilde  
29 AA, Roden DM, and Bezzina CR. Polymorphisms in the cardiac sodium channel  
30 promoter displaying variant in vitro expression activity. *Eur J Hum Genet* 2007.  
31 16:350-357.
- 32 10. Lowe JS, Palygin O, Bhasin N, Hund TJ, Boyden PA, Shibata E, Anderson ME,  
33 and Mohler PJ. Voltage-gated Nav channel targeting in the heart requires an  
34 ankyrin-G dependent cellular pathway. *J. Cell Biol.* 2008. 180:173-186.
- 35 11. Liu K, Hipkens S, Yang T, Abraham R, Zhang W, Chopra N, Knollmann B,  
36 Magnuson MA, and Roden DM. Recombinase-mediated cassette exchange to  
37 rapidly and efficiently generate mice with human cardiac sodium channels.  
38 *Genesis.* 2006. 44:556-564.
- 39 12. Knollmann BC, Chopra N, Hlaing T, Akin B, Yang T, Etensohn K, Knollmann BEC,  
40 Horton KD, Weissman NJ, Holinstat I, Zhang W, Roden DM, Jones LR, Franzini-

- 1           Armstrong C, and Pfeifer K. Casq2 deletion causes sarcoplasmic reticulum volume  
2           increase, premature Ca<sup>2+</sup> release, and catecholaminergic polymorphic ventricular  
3           tachycardia. *J Clin Invest* 2006. 116:2510-2520.
- 4       13. Mitra R and Morad M. A uniform enzymatic method for dissociation of myocytes  
5       from hearts and stomachs of vertebrates. *Am. J. Physiol.* 1985. 249:H1056-60.
- 6       14. Rottman JN, Ni G, and Brown M. Echocardiographic Evaluation of Ventricular  
7       Function in Mice. *Echocardiography* 2007. 24:83-89.  
8  
9
